1 **Yeast-expressed Recombinant SARS-CoV-2 Receptor Binding Domain, RBD203-N1 as a COVID-19**  
2 **Protein Vaccine Candidate**

3  
4 Wen-Hsiang Chen<sup>a</sup>, Jeroen Pollet<sup>a</sup>, Ulrich Strych<sup>a</sup>, Jungsoon Lee<sup>a</sup>, Zhuyun Liu<sup>a</sup>, Rakhi Tyagi Kundu<sup>a</sup>, Leroy  
5 Versteeg<sup>a</sup>, Maria Jose Villar<sup>a</sup>, Rakesh Adhikari<sup>a</sup>, Junfei Wei<sup>a</sup>, Cristina Poveda<sup>a</sup>, Brian Keegan<sup>a</sup>, Aaron  
6 Oakley Bailey<sup>b</sup>, Yi-Lin Chen<sup>a</sup>, Portia M. Gillespie<sup>a</sup>, Jason T. Kimata<sup>c</sup>, Bin Zhan<sup>a</sup>, Peter J. Hotez<sup>acde</sup>, Maria  
7 Elena Bottazzi<sup>acd\*</sup>

8  
9 <sup>a</sup> Departments of Pediatrics; Texas Children's Hospital Center for Vaccine Development; National School  
10 of Tropical Medicine; Baylor College of Medicine, Houston, TX, USA

11 <sup>b</sup> Mass Spectrometry Facility, Department of Biochemistry and Molecular Biology, The University of  
12 Texas Medical Branch, Galveston, TX, USA

13 <sup>c</sup> Department of Molecular Virology and Microbiology, Baylor College of Medicine, Houston, TX, USA

14 <sup>d</sup> Department of Biology, Baylor University, Waco, TX, USA

15 <sup>e</sup> James A. Baker III Institute for Public Policy, Rice University, Houston, TX, USA

16

17 correspondence:

18 \*Maria Elena Bottazzi [bottazzi@bcm.edu](mailto:bottazzi@bcm.edu), 1102 Bates St., Ste. 550 | Houston, TX 77030

19 **ABSTRACT**

20

21 *Background:* SARS-CoV-2 protein subunit vaccines are being evaluated by multiple manufacturers to fill  
22 the need for low-cost, easy to scale, safe, and effective COVID-19 vaccines for global access. Vaccine  
23 candidates relying on the receptor-binding domain (RBD) of the SARS-CoV-2 spike protein have been the  
24 focus of our development program. In this paper, we report on the generation of the RBD203-N1 yeast  
25 expression construct, which produces a recombinant protein that when formulated with alum and the  
26 TLR-9 agonist, CpG1826 elicits a robust immune response and protection in mice.

27 *Method:* The RBD203-N1 antigen was expressed in the yeast *Pichia pastoris* X33. After fermentation at  
28 the 5 L scale, the protein was purified by hydrophobic interaction chromatography followed by anion  
29 exchange chromatography. The purified protein was characterized biophysically and biochemically, and  
30 after its formulation, the immunogenicity and efficacy were evaluated in mice.

31 *Results, Conclusions, and Significance:* The RBD203-N1 production process yielded  $492.9 \pm 3.0$  mg/L of  
32 protein in the fermentation supernatant. A two-step purification process produced a >96% pure protein  
33 with a recovery rate of  $55 \pm 3\%$  (total yield of purified protein:  $270.5 \pm 13.2$  mg/L fermentation  
34 supernatant). The protein was characterized as a homogeneous monomer with well-defined secondary  
35 structure, thermally stable, antigenic, and when adjuvanted on alum and CpG, it was immunogenic and  
36 induced robust levels of neutralizing antibodies against SARS-CoV-2 pseudovirus. These characteristics  
37 show that this vaccine candidate is well suited for technology transfer with feasibility of its transition  
38 into the clinic to evaluate its immunogenicity and safety in humans.

39

40 **KEYWORDS:** coronavirus, *P. pastoris*, biophysical characterization, subunit vaccine, neutralization

41

42 **ABBREVIATIONS:** COVID-19, Coronavirus disease 2019; SARS, severe acute respiratory syndrome; CoV,  
43 coronavirus; S, spike; RBD, receptor-binding domain; DO, dissolved oxygen; FS, fermentation supernatant;  
44 CV, column volume; %CV, coefficient of variation; DLS, dynamic light scattering; CD, circular dichroism;  
45 ACE-2, angiotensin-converting enzyme 2; AEX, anion exchange chromatography; HIC, hydrophobic  
46 interaction chromatography; i.m., intramuscular; SE-HPLC, size-exclusion high-performance liquid  
47 chromatography; CpG, CpG oligodeoxynucleotide adjuvant; mAB, monoclonal antibody; TLR, toll-like  
48 receptor; NIBSC, National Institute for Biological Standards and Control

49

50

51 **1. INTRODUCTION**

52 As of August 20<sup>th</sup>, 2021, close to 5 billion doses of coronavirus vaccines have been administered in over  
53 180 countries. However, this impressive vaccination campaign has still left over 70% of the global

54 population without access to efficient protection from COVID-19 [1]. According to a recent analysis,  
55 people in the highest-income countries are getting vaccinated more than 20 times faster than those  
56 living in poverty [2]. Therefore, there remains an urgent need to add additional safe and effective  
57 vaccines to the global inventory and to produce these vaccines at the lowest cost possible when it  
58 comes to production, storage, and distribution.

59 Recombinant protein expression in yeast is a low-cost and therefore attractive platform of  
60 production as compared to other more costly production systems for biologics such as mammalian cell  
61 culture systems [3]. This has been demonstrated for multiple vaccine antigens in general [4, 5], and is  
62 currently the case for additional COVID-19 vaccines under development. The Argentinian AntiCovid  
63 Consortium, for example, showed recently that a SARS-CoV-2 receptor-binding domain antigen was just  
64 as well folded and stable when made in yeast as when it was produced in mammalian cell culture [6].  
65 Another yeast-produced RBD when displayed on hepatitis B virus-like particles was shown to effectively  
66 reduce viral loads in the respiratory tract of immunized cynomolgus macaques [7].

67 Our group has previously shown that a yeast-produced RBD vaccine antigen candidate (amino  
68 acid residues 331-549 of the SARS-CoV-2 spike protein), when combined with alum and 3M-052 (TLR7/8  
69 agonist), was able to protect *Rhesus macaques* from challenge with SARS-CoV-2 by eliciting robust  
70 humoral and cellular immune responses [8]. To reduce hyperglycosylation, aggregation, improve  
71 stability and enable better controlled scalable and reproducible process development, we removed one  
72 of the main glycosylation sites (N331) from the RBD and mutated a C-terminal cysteine residue (C538A).  
73 The resulting protein, RBD219-N1C1, was shown to maintain its ability to effectively trigger a robust  
74 immune response with a high level of neutralizing antibodies against SARS-CoV-2 [9, 10].

75 Here we report on the design, construction, and biophysical, biochemical, and immunological  
76 evaluation of a new construct, RBD203-N1 (residues 332–533), where we deleted the SARS CoV-2 RBD  
77 residues 534-549, including the cysteine residue at position 538. The data reported here support the  
78 potential of an RBD203-N1 protein-based vaccine as a candidate for technology transfer and its  
79 suitability for its transition into the clinic to evaluate safety, immunogenicity, and efficacy in humans.

80

## 81 **2. MATERIALS AND METHODS**

### 82 **2.1. Cloning and Fermentation of SARS-CoV-2 RBD203-N1 in *Pichia pastoris***

83 The recombinant *Pichia pastoris* X-33 construct expressing RBD203-N1 (residues 332–533 of the SARS-  
84 CoV-2 spike protein, GenBank: QHD43416.1) was generated as described previously [9, 11]. In short, the  
85 DNA encoding RBD203-N1 was synthesized and subcloned into the *Pichia* secretory expression vector  
86 pPICZ $\alpha$ A (Invitrogen) using EcoRI/XbaI restriction sites (GenScript). The recombinant plasmid was  
87 transformed into *P. pastoris* X-33.

88 The RBD203-N1 pPICZ $\alpha$ A/*P. pastoris* X33 construct was fermented in 5 L vessels [9, 11,  
89 12]. Briefly, the glycerol seed stock was used to inoculate 0.5 L Buffered Minimal Glycerol (BMG)  
90 medium for overnight culture, which was then used to inoculate 2.5 L sterile low salt medium (LS) in a  
91 fermenter containing 3.5 mL/L PTM1 trace elements and 3.5 mL/L 0.02% d-Biotin. Fermentation was  
92 initiated at 30 °C and pH 5.0, with dissolved oxygen (DO) maintained at 30%. Upon DO spike, the pH was  
93 ramped up to 6.5 using 14% ammonium hydroxide, and the temperature was lowered to 25°C over  
94 1 hour. Induction was initiated by adding methanol from 1 mL/L/h to 11 mL/L/h over 6 hours. After the  
95 methanol adaption stage, induction was maintained at 25 °C with a methanol feed rate from 11 to 15 for  
96 another 64 hours [12]. After fermentation, the culture was harvested by centrifugation. The  
97 fermentation supernatant (FS) was filtered using a 0.45  $\mu$ m PES filter and evaluated by SDS-PAGE.

## 98 **2.2. Protein Purification**

99 RBD203-N1 was purified based on Process-2 described in Lee *et al.* [12] with slight modifications in the  
100 capture step. Ammonium sulfate was added to the FS to a final concentration of 1.1 M (w/v) followed by  
101 pH adjustment to 8.0, and filtration through a 0.45  $\mu$ m PES filter. The filtered material was loaded onto a  
102 51.5 mL Butyl Sepharose HP column (Cytiva), which was washed with buffer A (30 mM Tris-HCl pH 8.0)  
103 containing 1.1 M ammonium sulfate. Bound protein was eluted in buffer A containing 0.44 M  
104 ammonium sulfate. UFDF and a polish step followed as described in the original *Process-2* [12]. Protein  
105 yield and the purity for the in-process and final purified RBD203-N1 were analyzed by SDS-PAGE. As a  
106 protein control, the yeast expressed RBD219-N1C1 protein was used and generated in-house as  
107 described [12].

## 108 **2.3. Western Blot**

109 Two micrograms of RBD203-N1 or RBD219-N1C1 were loaded on 4-20% Tris-glycine gels, and  
110 transferred to a polyvinylidene difluoride membrane, and probed with eight different in-house  
111 generated mouse monoclonal antibodies raised against SARS-CoV-2 RBD219-WT (1 $\mu$ g/mL in 10mL; mAB

112 #s 1128, 643, 486, 902, 854, 942, 748 and 102), respectively. A 1:3,000 dilution of an AP-conjugated goat  
113 anti-mouse IgG (KPL) was used as the secondary antibody.

#### 114 **2.4. ELISA using Anti-RBD219-N1C1 Mouse Monoclonal Antibodies**

115 In this experiment, we evaluated the binding of eight anti-SARS-CoV-2 RBD219-WT mAbs (# 1128, 643,  
116 486, 902, 854, 942, 748, and 102) to RBD203-N1 and RBD219-N1C1. Ninety-six-well ELISA plates were  
117 coated with 100  $\mu$ L 2  $\mu$ g/mL of either RBD203-N1 or RBD219-N1C1 overnight in duplicate at 4°C  
118 followed by blocking with PBST/0.1% BSA overnight at 4°C. Once the plates were blocked, 100  $\mu$ L 3x  
119 serially-diluted mAb with an initial concentration of 2  $\mu$ g/mL was added to the wells. The plates were  
120 incubated at room temperature for 2 hours to allow mAb to bind to RBDs. After this binding step, the  
121 plates were washed with PBST four times followed by adding 100  $\mu$ L 1:6,000 diluted HRP conjugated  
122 anti-mouse IgG antibodies (LSBiosciences) and incubated for 1 hour at room temperature. Finally, 100  
123  $\mu$ L TMB substrate was added and incubated for 4 minutes in the dark to react with HRP. The reaction  
124 was terminated with 100  $\mu$ L of 1M HCl and absorption readings were taken at 450 nm using a BioTek  
125 EPOCH 2 microplate reader.

#### 126 **2.5. Identity and purity by SE-HPLC**

127 Waters Alliance HPLC Separations Modules and Associated PDA Detectors were operated as per the  
128 vendor's instruction. Fifty micrograms of Bio-Rad gel filtration standard or RBD203-N1 were injected into  
129 a TSKgel® G2000SWXL column (300 mm X 7.8 mm), and eluted in 20 mM Tris, 150 mM NaCl, pH 7.5 (1X  
130 TBS) at the flow rate of 0.6 mL/min.

#### 131 **2.6. Size Assessment by Dynamic Light Scattering (DLS)**

132 The size of RBD203-N1 in solution was analyzed using DLS. Briefly, the concentration of the protein was  
133 adjusted to 1 mg/mL using 1X TBS. The samples were then filtered through 0.02  $\mu$ m filters. Four  
134 replicates of forty microliters of protein were loaded into each well of a clear bottom 384-well plate. The  
135 hydrodynamic radii of the proteins were measured using a DynaPro Plate Reader II.

#### 136 **2.7. Structural Assessment by Circular Dichroism (CD)**

137 Purified RBDs were diluted with deionized water to a final concentration of 0.2 mg/mL and loaded into a  
138 0.1 cm path cuvette. Dilution with water was to reduce the chloride ion content, which is known to  
139 interfere with the CD absorbance, especially at low wavelengths. CD spectra were obtained from 250 to  
140 190 nm with a Jasco J-1500 spectrophotometer set at 100 nm/min and a response time of 1 s at 25°C.

141 The CD data were analyzed using a CD Analysis and Plotting Tool (<https://capito.uni-jena.de/index.php>).  
142 In addition, the RBDs (0.5 mg/mL) were heated from 25 °C to 95 °C for a denaturation profile analysis.

### 143 **2.8. Structural Assessment by Thermal shift**

144 RBD203-N1 or RBD219-N1C1 were diluted to 0.32 mg/mL and mixed with the reagents in Protein  
145 Thermal Shift™ Dye kit (Thermo Fisher) as per the vendor's instructions. In short, 12.5 µL of 0.32 mg/mL  
146 RBD were mixed with 5 µL of Protein Thermal Shift buffer, followed by 2.5 µL of 8x Protein Thermal Shift  
147 dye in three to four replicates. These samples were vortexed briefly and centrifuged to remove any  
148 bubbles and further heated from 25 °C to 95 °C to monitor the change of fluorescence intensity using a  
149 ViiA™ 7 Real-Time PCR system.

### 150 **2.9. *in vitro* Functionality Assay by ELISA (ACE-2 binding)**

151 Ninety-six-well ELISA plates were coated with 100 µL 5 µg/mL ACE-2-hFc (LakePharma) overnight at 4°C  
152 followed by blocking with PBST/0.1% BSA. Once the plates were blocked, 100 µL serially diluted RBD219-  
153 N1C1 or RBD203-N1 with an initial concentration of 40 µg/mL were added to the wells. The plates were  
154 incubated at room temperature for 2 hours to allow ACE-2 to interact with each RBD. After this binding  
155 step, the plates were washed with PBST four times followed by adding 100 µL of 1:5,000 diluted anti-  
156 RBD219-WT horse sera followed by 1:10,000 diluted HRP conjugated anti-horse IgG antibodies and  
157 incubating for 1 hour at room temperature. Finally, 100 µL TMB substrate were added and incubated for  
158 15 min in the dark to react with HRP. The reaction was terminated with 100 µL of 1M HCl and absorption  
159 readings were taken at 450 nm using a BioTek EPOCH 2 microplate reader.

160

### 161 **2.10. Preclinical Study Design**

162 A preclinical study in mice was performed under the approved Institutional Animal Care and Use  
163 Committee (IACUC) protocol at Baylor College of Medicine. The study design is shown in Supplementary  
164 Table 1. Formulations were prepared with 7 µg protein per dose, and the protein was first adsorbed on  
165 200 µg of aluminum hydroxide (alum; containing 100 µg of aluminum) before 20 µg of CpG1826 (vac-  
166 1826-1, Invivogen) were added at the point of injection. 6–8-week-old Female BALB/c mice were  
167 immunized twice intramuscularly (i.m.) at 21-day intervals and then euthanized 14 days after the second  
168 immunization.

169

170

171

172           **2.11.           Antigen-specific Antibody Measurements by ELISA**

173    To examine RBD-specific antibodies in mouse sera, indirect ELISAs were conducted as described  
174    previously [13]. Briefly, 96-well ELISA plates were coated with 100  $\mu$ L of 2  $\mu$ g/mL RBDs in 1x coating  
175    buffer and incubated overnight at 4  $^{\circ}$ C. The plates were then blocked with 200  $\mu$ L/well PBST/0.1% BSA  
176    for 2 hours at room temperature. After being washed once with 300  $\mu$ L PBST. 100  $\mu$ L of serially diluted  
177    mouse serum samples, naïve mouse serum, and blank (PBST/0.1% BSA) were added to the plate and  
178    incubated for 2 hours at room temperature. The plates were further washed four times with PBST and  
179    dispensed with 100  $\mu$ L of 1:6,000 diluted goat anti-mouse IgG HRP for 1 hour at room temperature,  
180    followed by washing five times with PBST. Finally, 100  $\mu$ L TMB substrate were added to each well and  
181    incubated for 15 minutes at room temperature. After incubation, the reaction was stopped by adding  
182    100  $\mu$ L of 1 M HCl. The absorbance at a wavelength of 450 nm was measured using a BioTek Epoch 2  
183    spectrophotometer.

184           **2.12.           Cytokine Measurements by Luminex**

185    Splenocytes preparation and cytokine measurements were performed as previously described [13].  
186    Briefly, GentleMACS Octo Dissociator was used to dissociate spleen and pelleted splenocytes. The  
187    splenocytes were then resuspended in 1 mL ACK lysing buffer for 1 minute at room temperature  
188    followed by the addition of 40 mL PBS. Splenocytes were again pelleted and resuspended in 5 mL 4 $^{\circ}$ C  
189    cRPMI (RPMI 1640 + 10% HI FBS + 1x pen/strep) and transferred through a 40  $\mu$ m filter to obtain a  
190    single-cell suspension.

191    For the in vitro cytokine release assay, splenocytes were seeded in a 96-well culture plate at  $1 \times 10^6$  live  
192    cells in 250  $\mu$ L cRPMI and stimulated with 10  $\mu$ g/mL RBDs for 48 hours at 37 $^{\circ}$  C 5% CO<sub>2</sub>, PMA/Ionomycin  
193    and media were used as the positive and negative control, respectively. After incubation, 96-well plates  
194    were centrifuged and the supernatant was transferred to a new 96-well plate to measure levels of IL-1 $\beta$ ,  
195    IL-2, IL-4, IL-6, IL-10, IL-13, IL-17A, IFN- $\gamma$ , and TNF- $\alpha$  using Milliplex Mouse Th17 Luminex kit (EMD  
196    Millipore) on a MagPix Luminex instrument. Raw data were first analyzed by Bio-Plex Manager software  
197    followed by Excel and Prism.

198           **2.13.           Pseudovirus assay**

199    Pseudovirus experiments were executed as previously published [13]. Using in vitro grown human 293T-  
200    hACE2 cells, infected cells were quantified based on the expression of luciferase. The plasmids used for  
201    the pseudovirus production are the luciferase-encoding reporter plasmid (pNL4-3.lucR-E-), Gag/Pol-

202 encoding packaging construct (pΔ8.9), and codon-optimized SARS-CoV-2 spike protein expression  
203 plasmids (pcDNA3.1-CoV-2 S gene) based on clone p278-1. Pseudovirus containing supernatants were  
204 recovered after 48 hours and passed through a 0.45 μm filter and saved at -80°C until used for  
205 neutralization studies.

206 Ten microliters of pseudovirus (~500 relative infection units) were incubated with serial dilutions of the  
207 serum samples for 1 hour at 37°C. Next, 100 μL of sera-pseudovirus were added to 293T-hACE2 cells in  
208 96-well poly-D-lysine coated culture plates. Following 48 hours of incubation in a 5% CO<sub>2</sub> environment  
209 at 37°C, the cells were lysed with 100 μL of Promega Glo Lysis buffer for 15 min at RT. Finally, 50 μL of  
210 the lysate were added to 50 μL luc substrate (Promega Luciferase Assay System). The amount of  
211 luciferase was quantified by luminescence (relative luminescence units (RLU)), using the Luminometer  
212 (Biosynergy H4). The percentage (%) virus inhibition was calculated as

$$213 \quad \% \text{ virus inhibition} = 1 - \frac{\text{Log}_{10}(\text{sample}) - \text{Log}_{10}(\text{uninfected cells})}{\text{Log}_{10}(\text{infected cells}) - \text{Log}_{10}(\text{uninfected cells})} \times 100$$

214 Serum from vaccinated mice was also compared by their 50% inhibitory dilution (IC<sub>50</sub>), defined as the  
215 serum dilution at which the virus infection was reduced by 50% compared with the negative control  
216 (virus + cells).

217

### 218 3. RESULTS

#### 219 3.1. Cloning, Production, Size and Purity Evaluation of RBD203-N1

220 SARS-CoV-2 RBD203-N1 (residues 332-533 of the spike protein) is a truncated version of the previously  
221 developed SARS-CoV-2 vaccine antigen, RBD219-N1C1, with 16 amino acid residues removed from the  
222 C-terminus. N1 designates the exclusion of N331, a putative N-glycosylation site, from the construct  
223 (**Figure 1**). To evaluate the reproducibility of the production process, two identical 5L scale production  
224 runs were performed. During production, the yield and the recovery were monitored (**Table 1**). The  
225 results indicated a fermentation yield for RBD203-N1 of 492.9 ± 3.0 mg/L of fermentation supernatant  
226 (FS) with an overall recovery of 55 ± 3% after purification. When evaluating the coefficient of variation of  
227 the process, one could notice that the %CV was lower than 6% throughout the process, indicating that  
228 the process was reproducible. Purity analysis of the in-process samples (**Figure 2A**) revealed that the  
229 downstream process efficiently improved the purity from 61.8 ± 1.1% to 97.0 ± 0.4% under reduced  
230 conditions, or from 75.0 ± 0.6% to 96.4 ± 0.9% under non-reduced conditions. SE-HPLC data also



231 revealed the purity of RBD203-N1 was approximately 99.9% (**Figure 2B**). Additionally, DLS indicated that  
232 RBD203-N1 was monodispersed (5.9% Polydispersity) with an estimated molecular weight of 31 kDa  
233 (**Figure 2C**).

234

### 235 **3.2. Western Blot and ELISA with monoclonal antibodies**

236 The antigenicity of RBD203-N1 against 8 different in-house generated anti-RBD monoclonal antibodies  
237 were evaluated using western blot with RBD219-N1C1 as a control (**Figure 3**). Overall, the binding profile  
238 of the antibodies to RBD203-N1 and RBD219-N1C1 was similar. Neutralizing antibodies (mAbs 1128, 643,  
239 and 486) likely recognized conformational epitopes and thus did not recognize reduced RBDs well. mAbs  
240 854 and 942 recognized both non-reduced and reduced RBD equally, while mAbs 748 and 102  
241 recognized the reduced RBDs stronger than the reduced RBDs. Although 203 dimer was not detectable  
242 in SDS-PAGE, SE-HPLC, these monoclonal antibodies all recognized the RBD203 dimer form. Interestingly,  
243 mAb486 only recognized the RBD dimer but not the monomer, suggesting that the dimer form might  
244 have better preserved the conformation for antibody recognition.

245 Similar to the western blot, ELISAs were performed using the same monoclonal panel against  
246 RBD203-N1 and RBD219-N1C1, respectively. Similar binding profiles were observed for both proteins for  
247 seven of the eight mAbs in a native condition. With mAb-486, a slightly lower affinity to RBD203-N1 was  
248 observed (**Figure 4**).

249

250

### 251 **3.3. Secondary structure thermal stability assessment**

252 When far-UV CD spectrometry was performed to investigate the secondary structure of RBD203-N1 in  
253 comparison with RBD219-N1C1, we observed very similar data (**Figure 5A**). The thermal stability of the  
254 secondary structures was evaluated by heating the samples from 25 °C to 95 °C (**Figures 5B-5C**) and CD  
255 melting curves and their derivatives were further examined at 231 nm (**Figures. 5D-5E**). Based on the  
256 derivative, the average melting temperatures ( $T_m$ ) were 50.8 °C and 51.9 °C for RBD203-N1 and RBD219-  
257 N1C1, respectively, suggesting similar thermal stability.

258

259

### 260 **3.4. Tertiary structure thermal stability assessment**

261 In this study, we used thermal shift assays to compare the thermal stability of the tertiary structure for  
262 RBD203-N1 and RBD219-N1C1. The melting curve (**Figure 6A**) showed a similar fluorescence profile

263 between these two RBDs. The initial fluorescence of both proteins indicated similar surface  
264 hydrophobicity when they were still intact. When the temperature was increased, these two proteins  
265 started to denature ( $T_{on}$ ) at approximately 38 °C. Calculated from the derivatives, the melting  
266 temperatures ( $T_m$ ) were  $50.4 \pm 0.6$  °C and  $50.7 \pm 0.2$  °C for RBD203-N1 and RBD219-N1C1, respectively  
267 (**Figure 6B**), which further suggested that these two RBDs shared similar tertiary structures.

268

### 269 **3.5. The RBD203-N1 protein efficiently binds to ACE-2 *in vitro***

270 Li *et al.* have indicated that the most potent neutralizing antibodies that recognized the RBD blocked its  
271 binding to ACE-2 [14] and thus, confirming the ability of RBD to bind to ACE-2 is crucial. When comparing  
272 RBD203-N1 and RBD219-N1C1 in this way, both RBDs bound to ACE-2 similarly with EC50 values of  
273  $0.0417 \pm 0.005$  µg/mL and  $0.0410 \pm 0.004$  µg/mL, respectively (**Figure 7**).

274

### 275 **3.6. RBD203-N1 formulated with alum/CpG triggered strong immunity and neutralizing activity**

276 The study design to evaluate the immunogenicity and neutralizing activity is shown in **Figure 8A**. Mice  
277 were vaccinated twice on days 0 and 21, and on day 35, serum was tested for total anti-RBD IgG (**Figure**  
278 **8B**). With the addition of 20 µg of CpG in the formulation, we observed an approximately 1,000-fold  
279 increase in the magnitude of the total IgG titer and a noticeable reduction of the intra-cohort variation  
280 for both proteins. Luminex assays were used to evaluate the levels of cytokines after restimulation of  
281 splenocytes with RBD N1C1, and the heatmap (**Figure 8C**) indicated both RBD203-N1 and RBD219-N1C1  
282 triggered similar cytokine profiles with the same formulations. Consistent with the data previously  
283 shown [10], when formulated with alum alone, secretion of IFN-gamma, IL-6, and IL-10 was observed,  
284 while the addition of CpG produced a stronger and more balanced Th1/Th2 response, with increased  
285 levels of IL-2, IL-4, IL-6 and IFN-gamma(**Figure 8C**).

286 When neutralizing capacity was evaluated in a pseudovirus assay (**Figure 8D**), no neutralizing  
287 antibodies were detected in the sera of mice immunized twice with RBD/alum, alum, and alum+CpG.  
288 However, mice immunized with two doses of the 7 µg RBD/alum+CpG showed approximately 2.5-fold  
289 higher neutralizing antibody titers than the National Institute for Biological Standards and Control (NIBSC)  
290 human convalescent plasma standard. No significant differences in the titers were observed between  
291 mice immunized with RBD203-N1 or RBD219-N1C1, formulated alum+CpG. Collectively, the data suggest  
292 that RBD203-N1 and RBD219-N1C1 elicit similar levels of antigen-specific antibodies, neutralizing  
293 antibodies, and cytokines.

294

#### 295 4. DISCUSSION

296 Here we report on a COVID-19 vaccine candidate antigen based on a truncated receptor-binding domain  
297 construct of the SARS-CoV-2 spike protein. The antigen, RBD203-N1, was expressed effectively in the  
298 yeast *P. pastoris*, and purified by a combination of hydrophobic interaction chromatography and anion  
299 exchange chromatography. The fermentation yield using a process that we have previous developed for  
300 a similar vaccine antigen [12], was determined as  $492.9 \pm 3.0$  mg/L RBD203-N1 of FS. The overall  
301 recovery from this two-step purification scheme for RBD203-N1 was determined as  $55 \pm 3\%$ . The  
302 production process was demonstrated to be reproducible with less than 6% of %CV throughout the  
303 process between two identical production runs. RBD203-N1 was shown to be a protein of high purity  
304 when analyzed by SDS-PAGE (>96%) and SE-HPLC (>99%). DLS also indicated that the purified protein  
305 was monodispersed. When we inspected the molecular weight of the deglycosylated RBD203-N1 by  
306 mass spectrometry (**Supplementary method and Supplementary Figure 1**), we discovered two major  
307 RBD203-N1 species with additional EAEAEF or EAEF amino acid residues at the N-terminus. The EAEA  
308 residues are expected remnants due to well-described inefficient *P. pastoris* Ste13-protease cleavage of  
309 the signal peptide upstream of recombinant proteins expressed in the pPicZ $\alpha$ /*P. pastoris* system [15].  
310 The adjacent EF residues are derived from the translation of the EcoRI used for cloning of the RBD  
311 sequence in pPicZ $\alpha$ . Nevertheless, the different purified RBD203-N1 lots were consistently 82-85% of the  
312 EAEAEF- variant and 15-18% of the EAEF- variant again proving the reproducibility of the production  
313 process.

314 We further assessed the biophysical and biochemical characteristics of RBD203-N1 by evaluating  
315 its antigenicity, secondary structure, thermal stability, and *in vitro* functionality. When eight in-house  
316 monoclonal antibodies, generated against the wild-type RBD219 (no deletion of N or C) [8, 9] were used  
317 to evaluate the antigenicity of these two RBDs by western blot and ELISA, both RBDs were recognized  
318 mostly to the same extent. One exception was mAb486 that only recognized the dimer form of RBD203-  
319 N1 in the western blot, which suggested that the dimer form might have preserved the confirmation  
320 better. When assessing the secondary structures, far-UV CD spectra indicated that RBD203-N1 and  
321 RBD219-N1C1 proteins had similar secondary structures and the melting temperatures evaluated by CD  
322 further revealed that the thermal stability for the secondary structure of both proteins was comparable.  
323 Additionally, thermal shift assays also indicated that both RBDs shared comparable thermal stability for  
324 their tertiary structures. Moreover, the *in vitro* functionality assay further confirmed a similar binding  
325 affinity to ACE-2 to these RBDs, suggesting that these two RBDs shared the same biophysical and  
326 biochemical characteristics.

327           The immunogenicity in mice of RBD203-N1, when formulated with alum with or without the  
328 TLR9 agonist CpG, was evaluated. The addition of CpG to COVID-19 vaccine formulations has been  
329 demonstrated to promote antigen dose sparing as well as the induction of balanced Th1/Th2 immune  
330 responses with much lower intra-cohort variability [13]. When adjuvanted with CpG, the use of 7ug and  
331 2.3ug of RBD203-N1 protein elicited robust neutralizing antibody titers that were protective against  
332 SARS-CoV-2 pseudovirus particles. The level of neutralizing antibodies in the serum was 2.5-times higher  
333 than the NIBSC standard plasma and was also equivalent to the control RBD219-N1C1/alum+CpG  
334 vaccine [13]. The use of low RBD protein concentration, when formulated with alum alone and in a two-  
335 dose regime, did not trigger robust antigen-specific antibody titers and the neutralizing activity was  
336 undetectable. However, our studies with RBD/alum formulations in two- or three-dose regimens using  
337 higher protein doses have been shown to trigger robust immune responses with high neutralizing titers  
338 [10]. In addition, Nanogen, recently showed that their Nanocovax vaccine, consisting of a recombinant S  
339 protein formulated with alum was immunogenic and efficacious in various animal models [16].  
340 Therefore, RBD proteins, including RBD203-N1, adjuvanted with alum alone should continue to be  
341 evaluated for safety, immunogenicity, and efficacy especially in the context of the changing SARS CoV-2  
342 virus epidemiology.

## 343 **5. Conclusions**

344 In this study, we report on RBD203-N1, a truncated version of the SARS CoV-2 spike protein RBD. The  
345 fermentation yield of this construct was 493 mg/L of FS. The two-step purification process allowed for a  
346 recovery of more than 50% of RBD203-N1. The purified RBD203-N1 was of high purity (>96% by SDS-  
347 PAGE and >99% by SE-HPLC). When studying the biophysical and biochemical characteristics, we  
348 confirmed this truncated protein retained the expected secondary structure, thermal stability,  
349 antigenicity, and functionality. Additionally, when formulated with alum+CpG, it triggered a robust level  
350 of antigen-specific antibodies that possess neutralizing ability, as well as a desired balanced cytokine  
351 profile. Collectively, the data suggested that RBD203-N1 is a suitable vaccine candidate antigen for  
352 technology transfer and transition into the clinic to evaluate its safety, immunogenicity, and efficacy in  
353 humans.

## 354 **Author contributions**

355 WHC and JBP conceived the study, designed and performed experiments, interpreted data and drafted  
356 the manuscript; US designed experiments, interpreted data and drafted the manuscript; JL, ZL, LV, BZ  
357 designed and performed experiments, interpreted data, and reviewed the manuscript; RTK, MJV, RA, JW,

358 CP, BK, AOB, YLC, BL performed experiments and reviewed the manuscript; PMG and JTK designed  
359 experiments and reviewed the manuscript; PJH and MEB conceived the study, designed experiments,  
360 provided scientific guidance and reviewed the manuscript.

### 361 **Conflict of interest**

362 The authors declare that Baylor College of Medicine has licensed the RBD219-N1C1 and RBD203-N1  
363 antigens to various industrial partners. The research conducted in this paper was performed in the  
364 absence of any commercial or financial relationships that could be construed as a potential conflict of  
365 interest.

### 366 **Acknowledgments**

367 This work was supported by the Robert J. Kleberg Jr. and Helen C. Kleberg Foundation; Fifth Generation,  
368 Inc. (Tito's Handmade Vodka); JPB Foundation, NIH-NIAID (AI14087201); and Texas Children's Hospital  
369 Center for Vaccine Development Intramural Funds. We also would like to thank PATH Center for Vaccine  
370 Innovation and Access (Seattle, WA, USA) for their guidance as well as technical and intellectual support.  
371 The Mass Spectrometry Facility at the University of Texas Medical Branch is supported in part by Cancer  
372 Prevention Research Institute of Texas (CPRIT), grant number RP190682.

373

374

375

376

377

378

379

380

381

382

383

384

## 385 References

- 386 [1] T. Randall, C. Sam, A. Tartar, P. Murray, C. Cannon, More Than 4.16 Billion Shots Given: Covid-19  
387 Tracker, in, Bloomberg, 2021.
- 388 [2] Bloomberg COVID-19 Vaccine Tracker, [https://www.bloomberg.com/graphics/covid-vaccine-tracker-](https://www.bloomberg.com/graphics/covid-vaccine-tracker-global-distribution/)  
389 [global-distribution/](https://www.bloomberg.com/graphics/covid-vaccine-tracker-global-distribution/).
- 390 [3] B. Owczarek, A. Gerszberg, K. Hnatuszko-Konka, A Brief Reminder of Systems of Production and  
391 Chromatography-Based Recovery of Recombinant Protein Biopharmaceuticals, *Biomed Res Int*, 2019  
392 (2019) 4216060.
- 393 [4] R. Kumar, P. Kumar, Yeast-based vaccines: New perspective in vaccine development and application,  
394 *FEMS Yeast Res*, 19 (2019).
- 395 [5] Z. Kis, R. Shattock, N. Shah, C. Kontoravdi, Emerging Technologies for Low-Cost, Rapid Vaccine  
396 Manufacture, *Biotechnol J*, 14 (2019) 1-2.
- 397 [6] C. Argentinian AntiCovid, Structural and functional comparison of SARS-CoV-2-spike receptor binding  
398 domain produced in *Pichia pastoris* and mammalian cells, *Sci Rep*, 10 (2020) 21779.
- 399 [7] N.C. Dalvie, L.H. Tostanoski, S.A. Rodriguez-Aponte, K. Kaur, S. Bajoria, O.S. Kumru, A.J. Martinot, A.  
400 Chandrashekar, K. McMahan, N.B. Mercado, J. Yu, A. Chang, V.M. Giffin, F. Nampanya, S. Patel, L.  
401 Bowman, C.A. Naranjo, D. Yun, Z. Flinchbaugh, L. Pessaint, R. Brown, J. Velasco, E. Teow, A. Cook, H.  
402 Andersen, M.G. Lewis, D.L. Camp, J.M. Silverman, H. Kleanthous, S.B. Joshi, D.B. Volkin, S. Biswas, J.C.  
403 Love, D.H. Barouch, A modular protein subunit vaccine candidate produced in yeast confers protection  
404 against SARS-CoV-2 in non-human primates, *bioRxiv*, (2021) 2021.2007.2013.452251.
- 405 [8] M. Pino, T. Abid, S. Pereira Ribeiro, V.V. Edara, K. Floyd, J.C. Smith, M.B. Latif, G. Pacheco-Sanchez, D.  
406 Dutta, S. Wang, S. Gumber, S. Kirejczyk, J. Cohen, R.L. Stammen, S.M. Jean, J.S. Wood, F. Connor-Stroud,  
407 J. Pollet, W.H. Chen, J. Wei, B. Zhan, J. Lee, Z. Liu, U. Strych, N. Shenvi, K. Easley, D. Weiskopf, A. Sette, J.  
408 Pollara, D. Mielke, H. Gao, N. Eisel, C.C. LaBranche, X. Shen, G. Ferrari, G.D. Tomaras, D.C. Montefiori,  
409 R.P. Sekaly, T.H. Vanderford, M.A. Tomai, C.B. Fox, M.S. Suthar, P.A. Kozłowski, P.J. Hotez, M. Paiardini,  
410 M.E. Bottazzi, S.P. Kasturi, A yeast expressed RBD-based SARS-CoV-2 vaccine formulated with 3M-052-  
411 alum adjuvant promotes protective efficacy in non-human primates, *Sci Immunol*, 6 (2021).
- 412 [9] W.H. Chen, J. Wei, R.T. Kundu, R. Adhikari, Z. Liu, J. Lee, L. Versteeg, C. Poveda, B. Keegan, M.J. Villar,  
413 A.C. de Araujo Leao, J.A. Rivera, P.M. Gillespie, J. Pollet, U. Strych, B. Zhan, P.J. Hotez, M.E. Bottazzi,  
414 Genetic modification to design a stable yeast-expressed recombinant SARS-CoV-2 receptor binding  
415 domain as a COVID-19 vaccine candidate, *Biochim Biophys Acta Gen Subj*, 1865 (2021) 129893.
- 416 [10] J. Pollet, W.H. Chen, L. Versteeg, B. Keegan, B. Zhan, J. Wei, Z. Liu, J. Lee, R. Kundu, R. Adhikari, C.  
417 Poveda, M.J. Villar, A.C. de Araujo Leao, J. Altieri Rivera, Z. Momin, P.M. Gillespie, J.T. Kimata, U. Strych,  
418 P.J. Hotez, M.E. Bottazzi, SARSCoV-2 RBD219-N1C1: A yeast-expressed SARS-CoV-2 recombinant  
419 receptor-binding domain candidate vaccine stimulates virus neutralizing antibodies and T-cell immunity  
420 in mice, *Hum Vaccin Immunother*, (2021) 1-11.
- 421 [11] W.H. Chen, S.M. Chag, M.V. Poongavanam, A.B. Biter, E.A. Ewere, W. Rezende, C.A. Seid, E.M.  
422 Hudspeth, J. Pollet, C.P. McAtee, U. Strych, M.E. Bottazzi, P.J. Hotez, Optimization of the Production  
423 Process and Characterization of the Yeast-Expressed SARS-CoV Recombinant Receptor-Binding Domain  
424 (RBD219-N1), a SARS Vaccine Candidate, *J Pharm Sci*, 106 (2017) 1961-1970.
- 425 [12] J. Lee, Z. Liu, W.H. Chen, J. Wei, R. Kundu, R. Adhikari, J.A. Rivera, P.M. Gillespie, U. Strych, B. Zhan,  
426 P.J. Hotez, M.E. Bottazzi, Process development and scale-up optimization of the SARS-CoV-2 receptor  
427 binding domain-based vaccine candidate, RBD219-N1C1, *Appl Microbiol Biotechnol*, 105 (2021) 4153-  
428 4165.

- 429 [13] J. Pollet, U. Strych, W.H. Chen, L. Versteeg, B. Keegan, B. Zhan, J. Wei, Z. Liu, J. Lee, R. Kundu, R.  
430 Adhikari, C. Poveda, M.J. Villar, B. Lopez, P.M. Gillespie, S. Ronca, J.T. Kimata, M. Reers, V. Paradkar, P.J.  
431 Hotez, M.E. Bottazzi, Receptor-binding domain recombinant protein RBD219-N1C1 on alum-CpG induces  
432 broad protection against SARS-CoV-2 variants of concern, *bioRxiv*, (2021).
- 433 [14] L. Liu, P. Wang, M.S. Nair, J. Yu, M. Rapp, Q. Wang, Y. Luo, J.F. Chan, V. Sahi, A. Figueroa, X.V. Guo, G.  
434 Cerutti, J. Bimela, J. Gorman, T. Zhou, Z. Chen, K.Y. Yuen, P.D. Kwong, J.G. Sodroski, M.T. Yin, Z. Sheng, Y.  
435 Huang, L. Shapiro, D.D. Ho, Potent neutralizing antibodies against multiple epitopes on SARS-CoV-2 spike,  
436 *Nature*, 584 (2020) 450-456.
- 437 [15] J.L. Cereghino, J.M. Cregg, Heterologous protein expression in the methylotrophic yeast *Pichia*  
438 *pastoris*, *FEMS Microbiology Reviews*, 24 (2000) 45-66.
- 439 [16] T.T.N. Mai, B. May, U.T. Thuan, N.M. Khoi, N.T.T. Trang, D. Van Long, D.C. Chung, T.T. Vinh, K. Hiep,  
440 N.T.T. Truc, H.H.Q. Huy, N.V. Anh, H.T. Phat, P.D. Luu, N.T. An, B.T. Ngoc, T.T. My, N.T. Theo, L.T.T. Hang,  
441 D.T. Lan, H.T. Hieu, H.P. Huong, L.N.T. Thao, T.C. Thao, P.H. Phi, Y. Luong Cong, N. Lim, C.M. Ngoc, N.D.  
442 Khanh, T.T. Hung, D.M. Si, PRE-CLINICAL IMMUNE RESPONSE AND SAFETY EVALUATION OF THE PROTEIN  
443 SUBUNIT VACCINE NANOCOAX FOR COVID-19, *bioRxiv*, (2021) 2021.2007.2020.453162.

444

445

446

447

448

449

450

451

452

453

454

455

456

457

458

459

460

461

462

463

464

465

## 466 **Figure Legends**

467

468

469

470 **Figure 1.** Sequence alignment between RBD219-WT, and RBD203-N1 of the SARS-CoV-2 spike protein. N1  
471 designated the exclusion of N331 (highlighted in red). The region highlighted in green is the receptor-  
472 binding motif.

473

474 **Figure 2.** (A) Purity assessment of in-process samples by SDS-PAGE (A), Purity and size assessment of  
475 purified RBD203-N1 by SE-HPLC (B) and by DLS (C).

476

477 **Figure 3.** Western blot analysis for RBD203-N1 (203) and RBD219-N1C1 (219) using eight anti-RBD219-  
478 N1C1 Mouse Monoclonal Antibodies.

479

480

481 **Figure 4.** Monoclonal antibody ELISA for RBD203-N1 (RBD203) and RBD219-N1C1 (RBD219). BSA was  
482 used as a negative control. RBDs or BSA were first coated on the plate, followed by incubation with  
483 specific RBD-mAbs, as indicated on top of each panel. Binding of the mAbs was detected using an HRP-  
484 labeled anti-mouse IgG secondary mAb.

485

486 **Figure 5.** Circular dichroism (CD) analysis of RBD203-N1 and RBD219-N1C1, including CD profile (A),  
487 overall melting profile of RBD203-N1 (B), and RBD219-N1C1 (C), and CD readouts and derivatives of  
488 RBD203-N1 (D) and RBD219-N1C1 (E) at 231 nm extracted from the overall melting profile.

489

490 **Figure 6.** Thermal shift assay to investigate the tertiary structure for RBD203-N1 and RBD219-N1C1 (A)  
491 and the derivative fluorescence-temperature plot (B). Water was used as a negative control.

492

493 **Figure 7.** ACE-2 binding study to evaluate the functionality of RBD203-N1 and RBD219-N1C1

494

495 **Figure 8:** A) Study timeline and table with vaccine formulations, B) Total IgG titers measured from  
496 mouse sera against RBD219-N1C1 protein (left) or RBD203-N1 protein (right). C) Heatmap of secreted  
497 cytokines measured in supernatant from splenocytes re-stimulated with RBD219-N1C1. Median values  
498 were calculated within each treatment group for each cytokine. D) IC50 values were measured by a  
499 neutralization assay using a lentiviral SARS-CoV-2 Wuhan pseudovirus. Kruskal Wallis tests were  
500 performed to evaluate for statistical significance between different groups.  $p > 0.12$  (not significant, ns),  
501  $p < 0.033$  (\*),  $p < 0.002$  (\*\*),  $p < 0.001$  (\*\*\*). RBD203 stands for RBD203-N1 and RBD219 stands for  
502 RBD219-N1C1.



503

504

505 **Tables**

506

507

508

| Step                     | Yield (mg/L of FS) <sup>a</sup> |       |            |     | Step Recovery (%) <sup>a</sup> |       |         |     | Overall Recovery (%) <sup>a</sup> |       |         |     |
|--------------------------|---------------------------------|-------|------------|-----|--------------------------------|-------|---------|-----|-----------------------------------|-------|---------|-----|
|                          | Run 1                           | Run 2 | Average    | %CV | Run 1                          | Run 2 | Average | %CV | Run 1                             | Run 2 | Average | %CV |
| FS                       | 495.0                           | 490.7 | 492.9±3.0  | 0.6 | -                              | -     | -       | -   | 100                               | 100   | 100±0   | 0.0 |
| Capture<br>(Butyl HP)    | 327.1                           | 322.7 | 324.9±3.1  | 1.0 | 66                             | 66    | 66±0    | 0.0 | 66                                | 66    | 66±0    | 0.0 |
| UFDF<br>(Pellicon<br>XL) | 323.9                           | 329.6 | 326.8±4.0  | 1.2 | 99                             | 102   | 101±2   | 2.0 | 65                                | 67    | 66±1    | 1.5 |
| Polish<br>(QXL)          | 261.2                           | 279.8 | 270.5±13.2 | 4.9 | 81                             | 85    | 83±3    | 3.6 | 53                                | 57    | 55±3    | 5.5 |

509 **Table 1.** Purification Yield and Process Recovery for RBD203-N1

510 <sup>a</sup> Average ± SD from two independent purification runs

511

512

513

514

Figure 1

```
RBD219-WT 331 NITNLCPFGEVFNATRFASVYAWNRKRISNCVADYSVLVNSASFSTFKCYGVSPTKLNDL 390
RBD203-N1 331 -ITNLCPFGEVFNATRFASVYAWNRKRISNCVADYSVLVNSASFSTFKCYGVSPTKLNDL 390
*****

RBD219-WT 391 CFTNVYADSFVIRGDEVQRQIAPGQTGKIADYNYKLPDDFTGCVIAWNSNNLDSKVGGNYN 450
RBD203-N1 391 CFTNVYADSFVIRGDEVQRQIAPGQTGKIADYNYKLPDDFTGCVIAWNSNNLDSKVGGNYN 450
*****

RBD219-WT 451 YLYRLFRKSNLKPFERDISTEIQAGSTPCNGVEGFNCYFPLQSYGFQPTNGVGYQPYRV 510
RBD203-N1 451 YLYRLFRKSNLKPFERDISTEIQAGSTPCNGVEGFNCYFPLQSYGFQPTNGVGYQPYRV 510
*****

RBD219-WT 511 VVLSFELLHAPATVCGPKKSTNLVKNKCVNFNFNGLTGT 549
RBD203-N1 511 VVLSFELLHAPATVCGPKKSTNL----- 533
*****
```

Figure 2

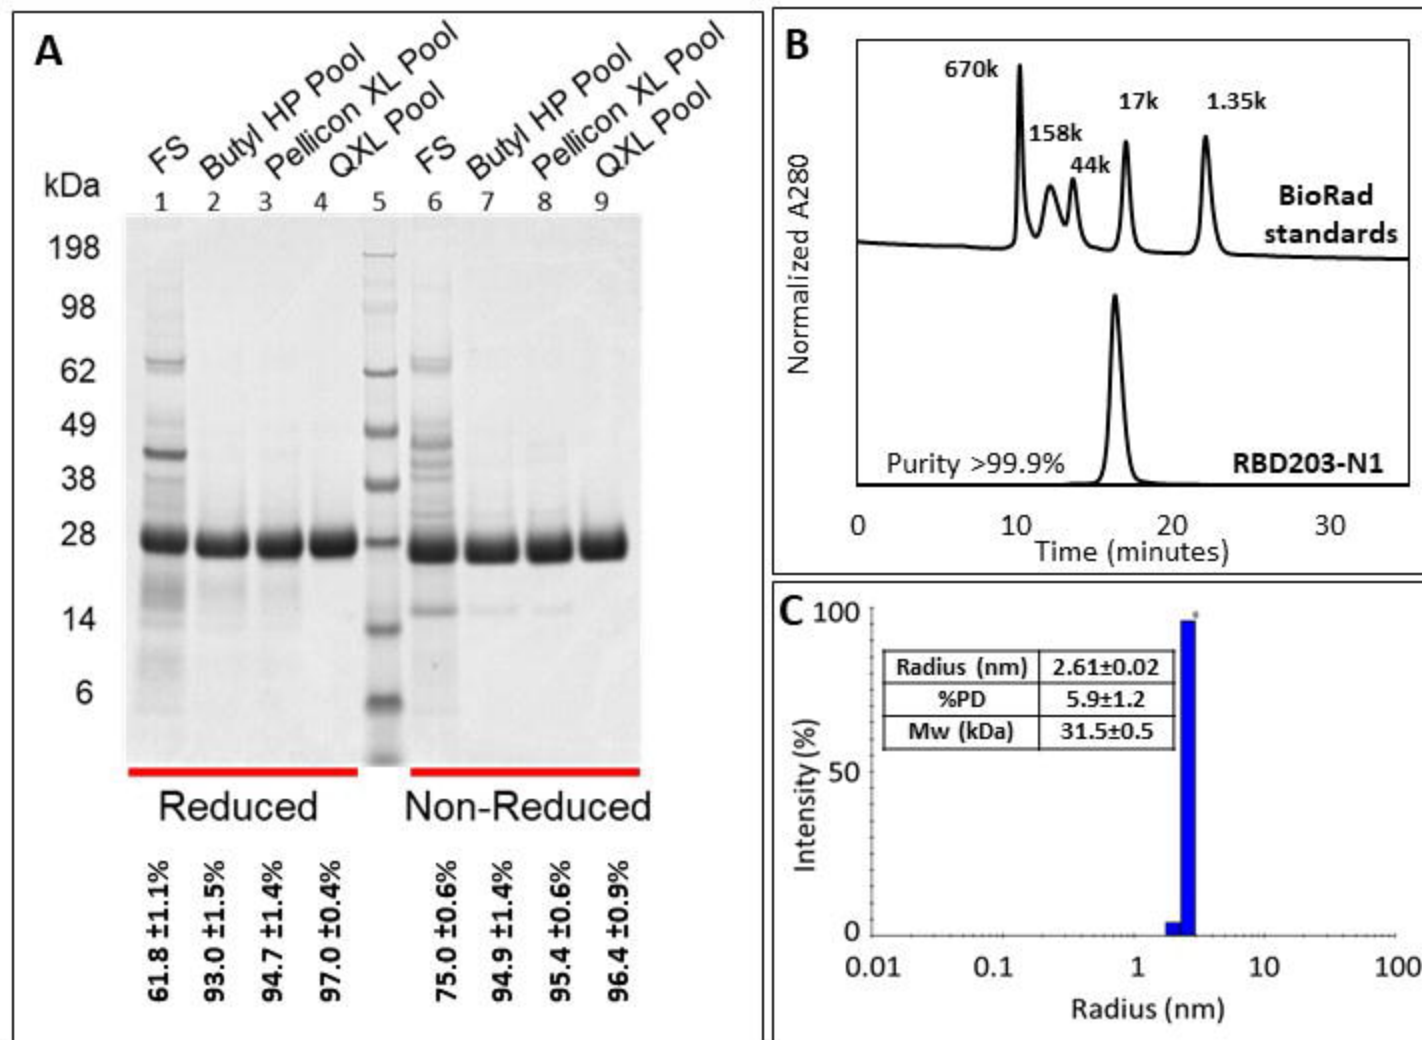

Figure 3

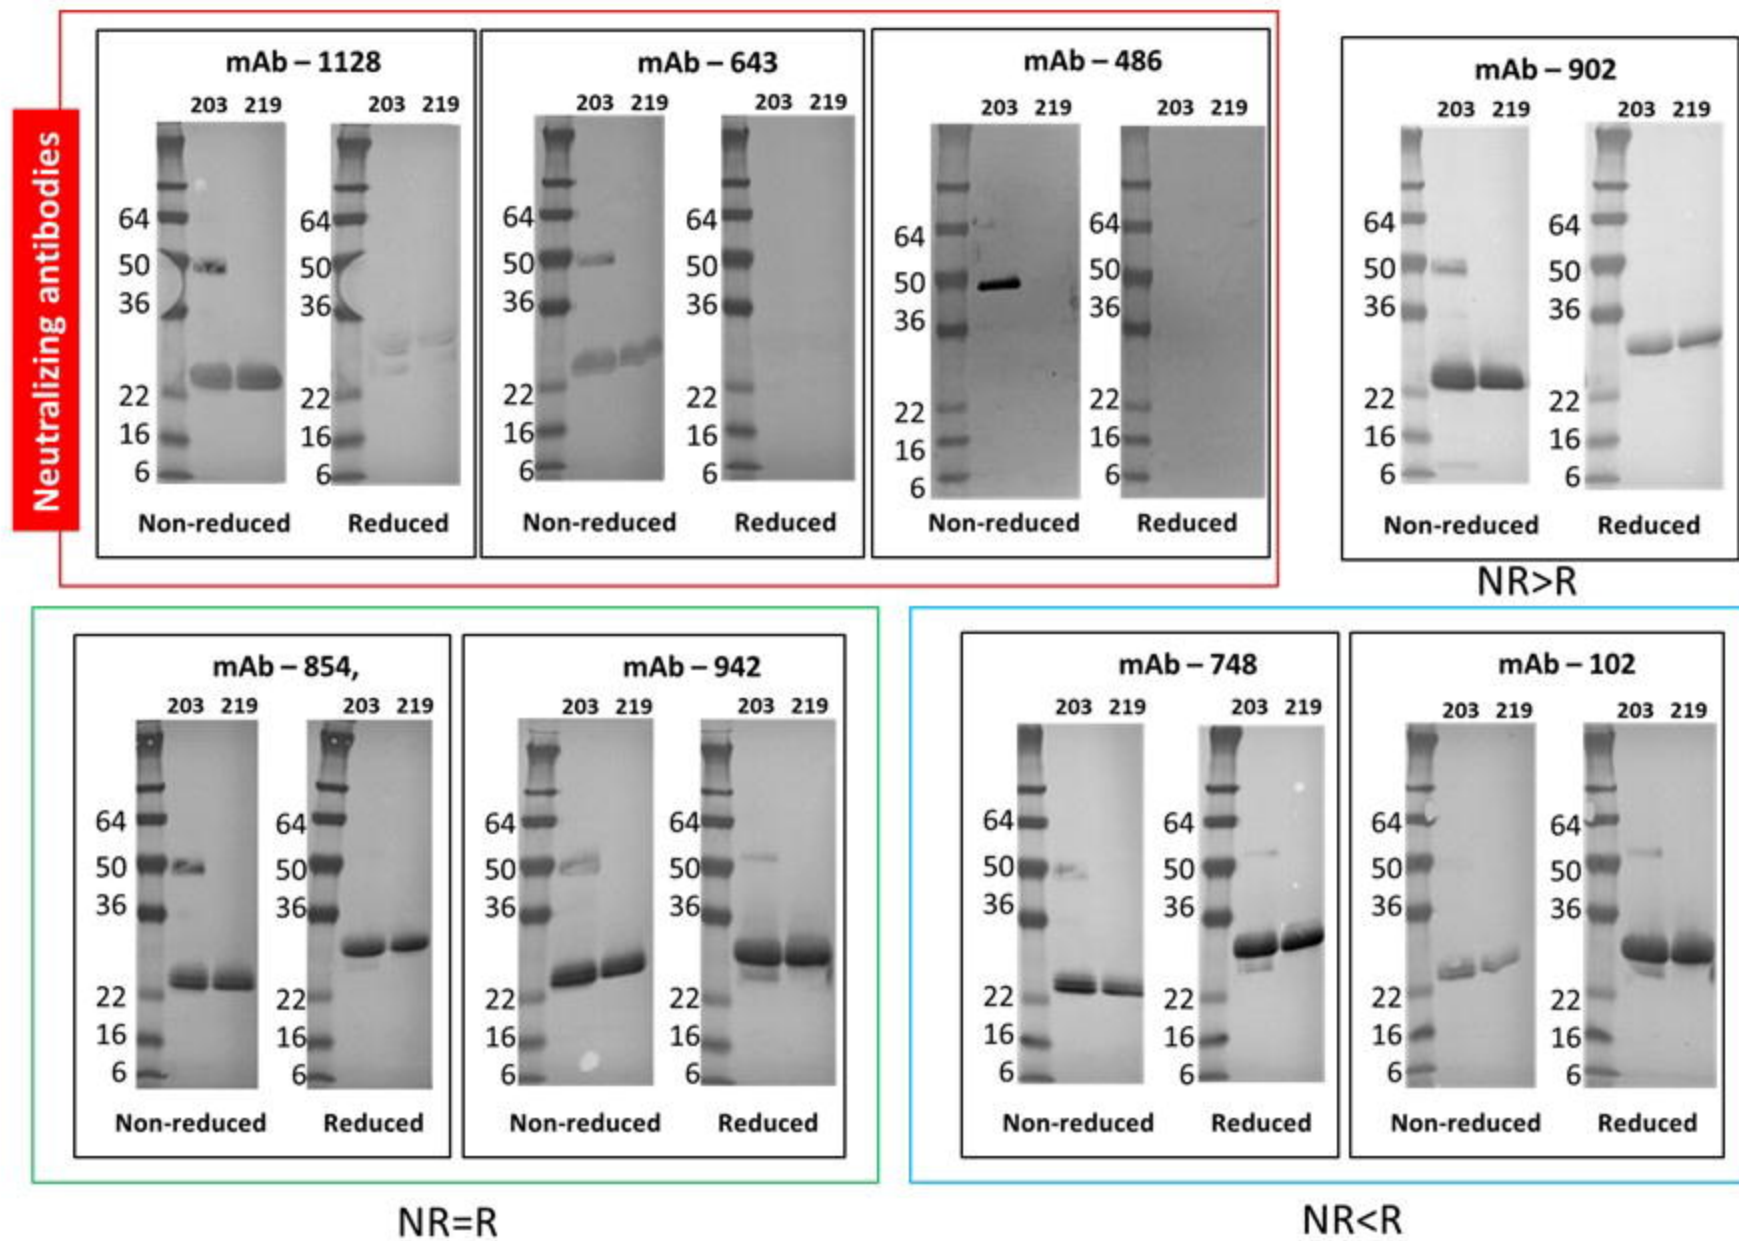

Figure 4

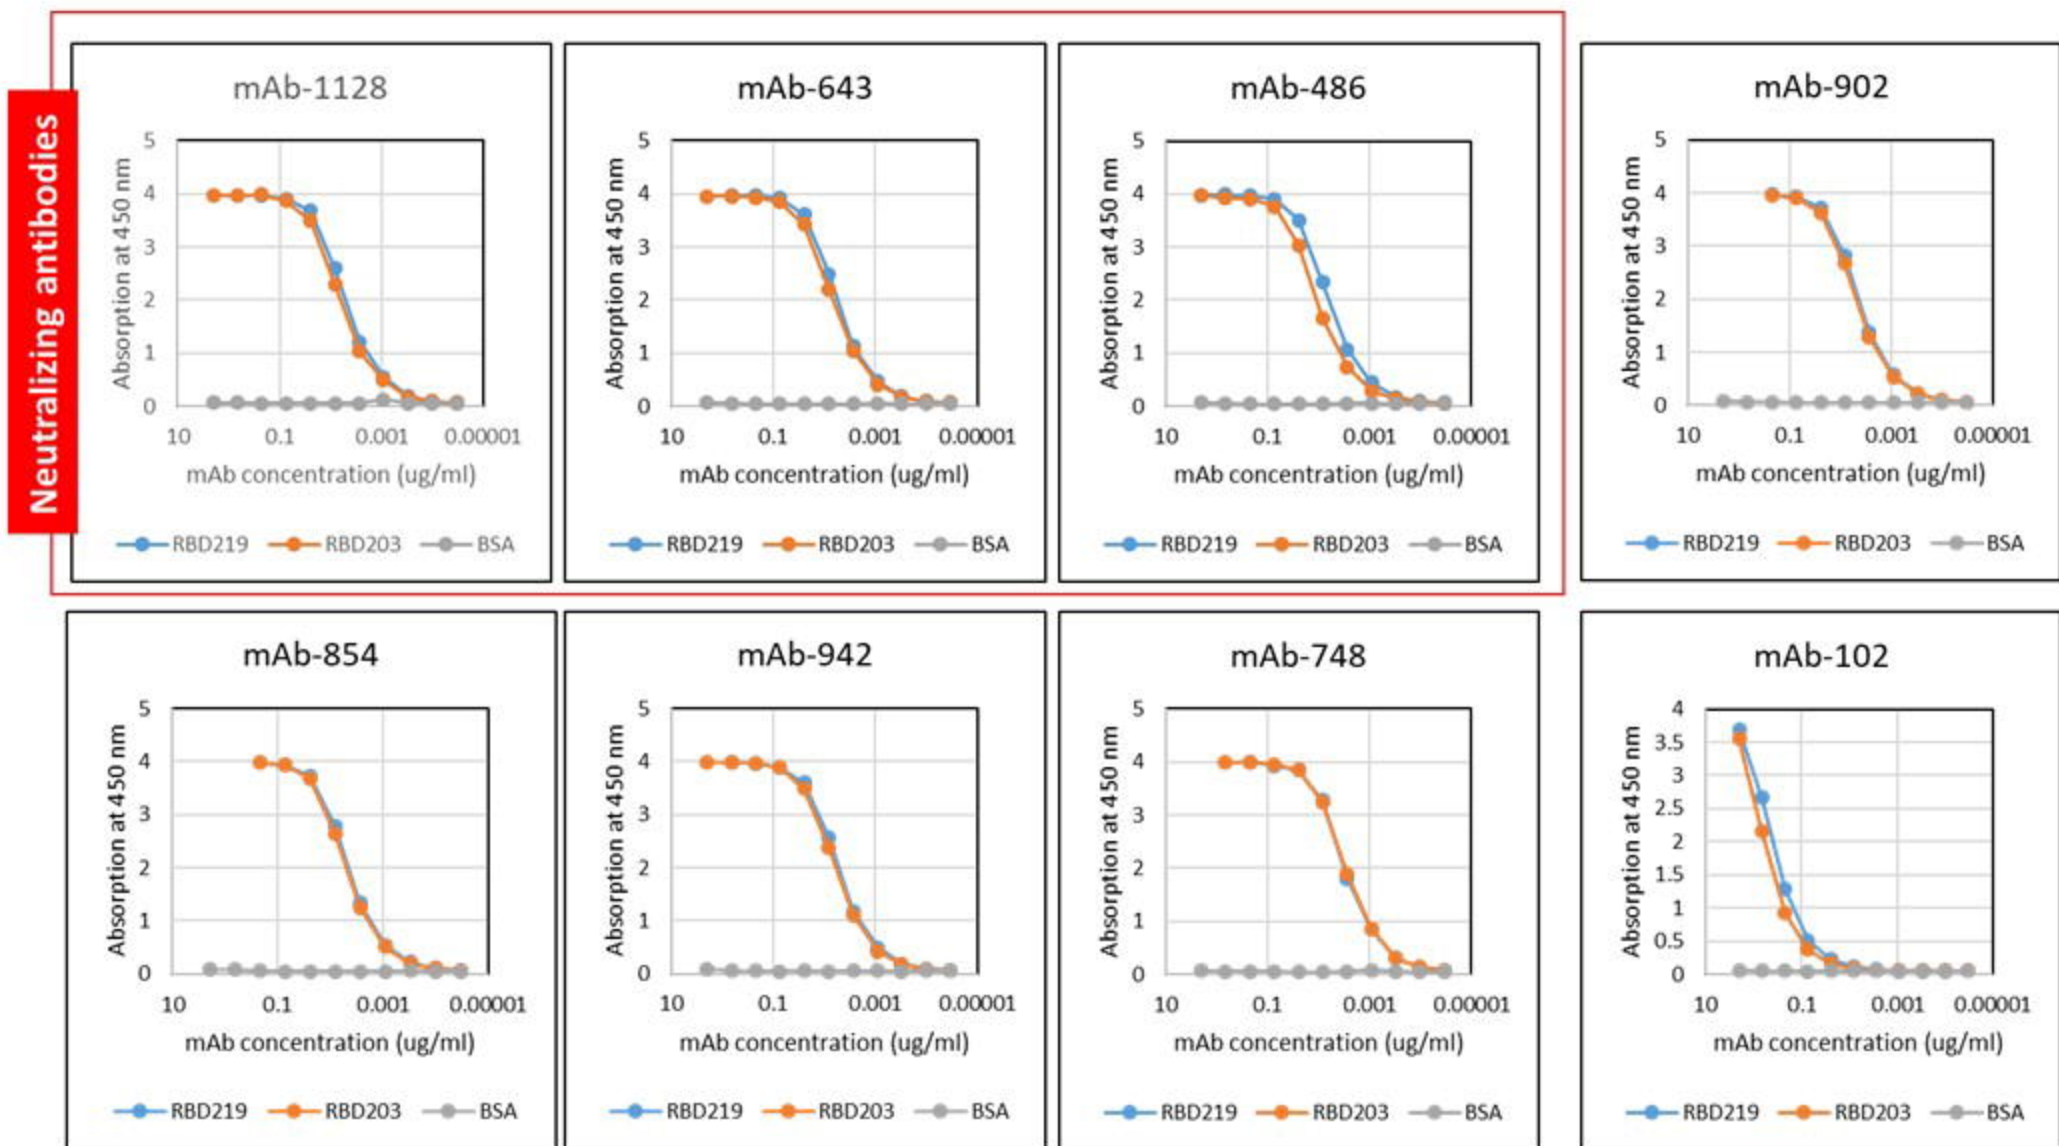

Figure 5

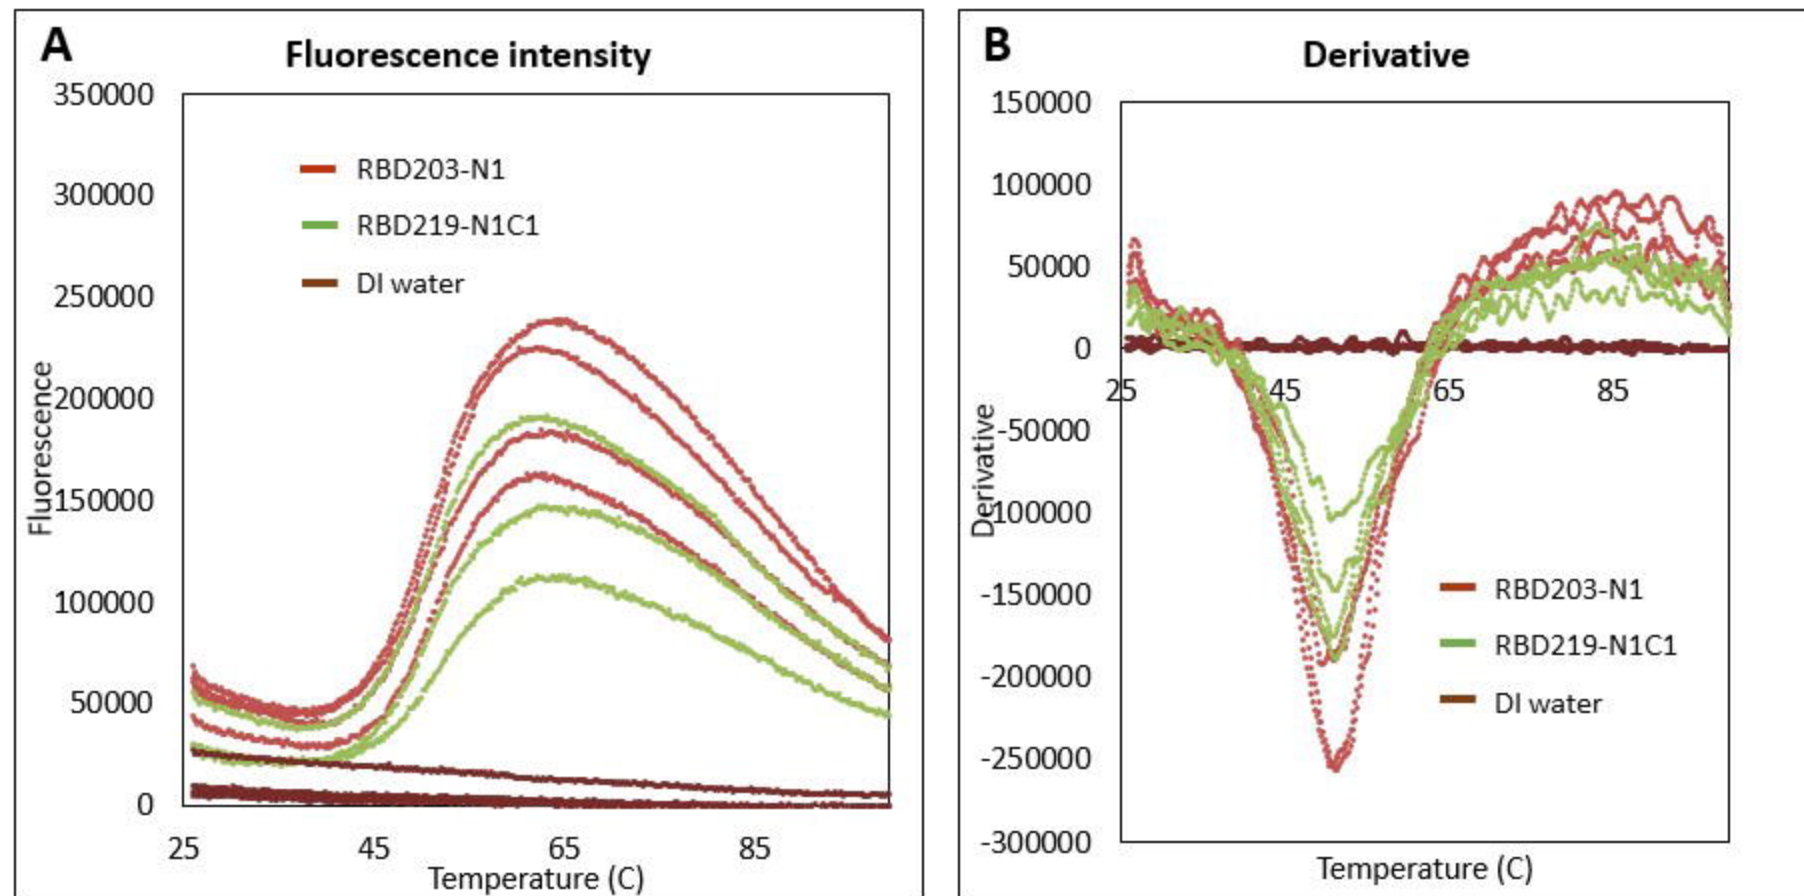

Figure 6

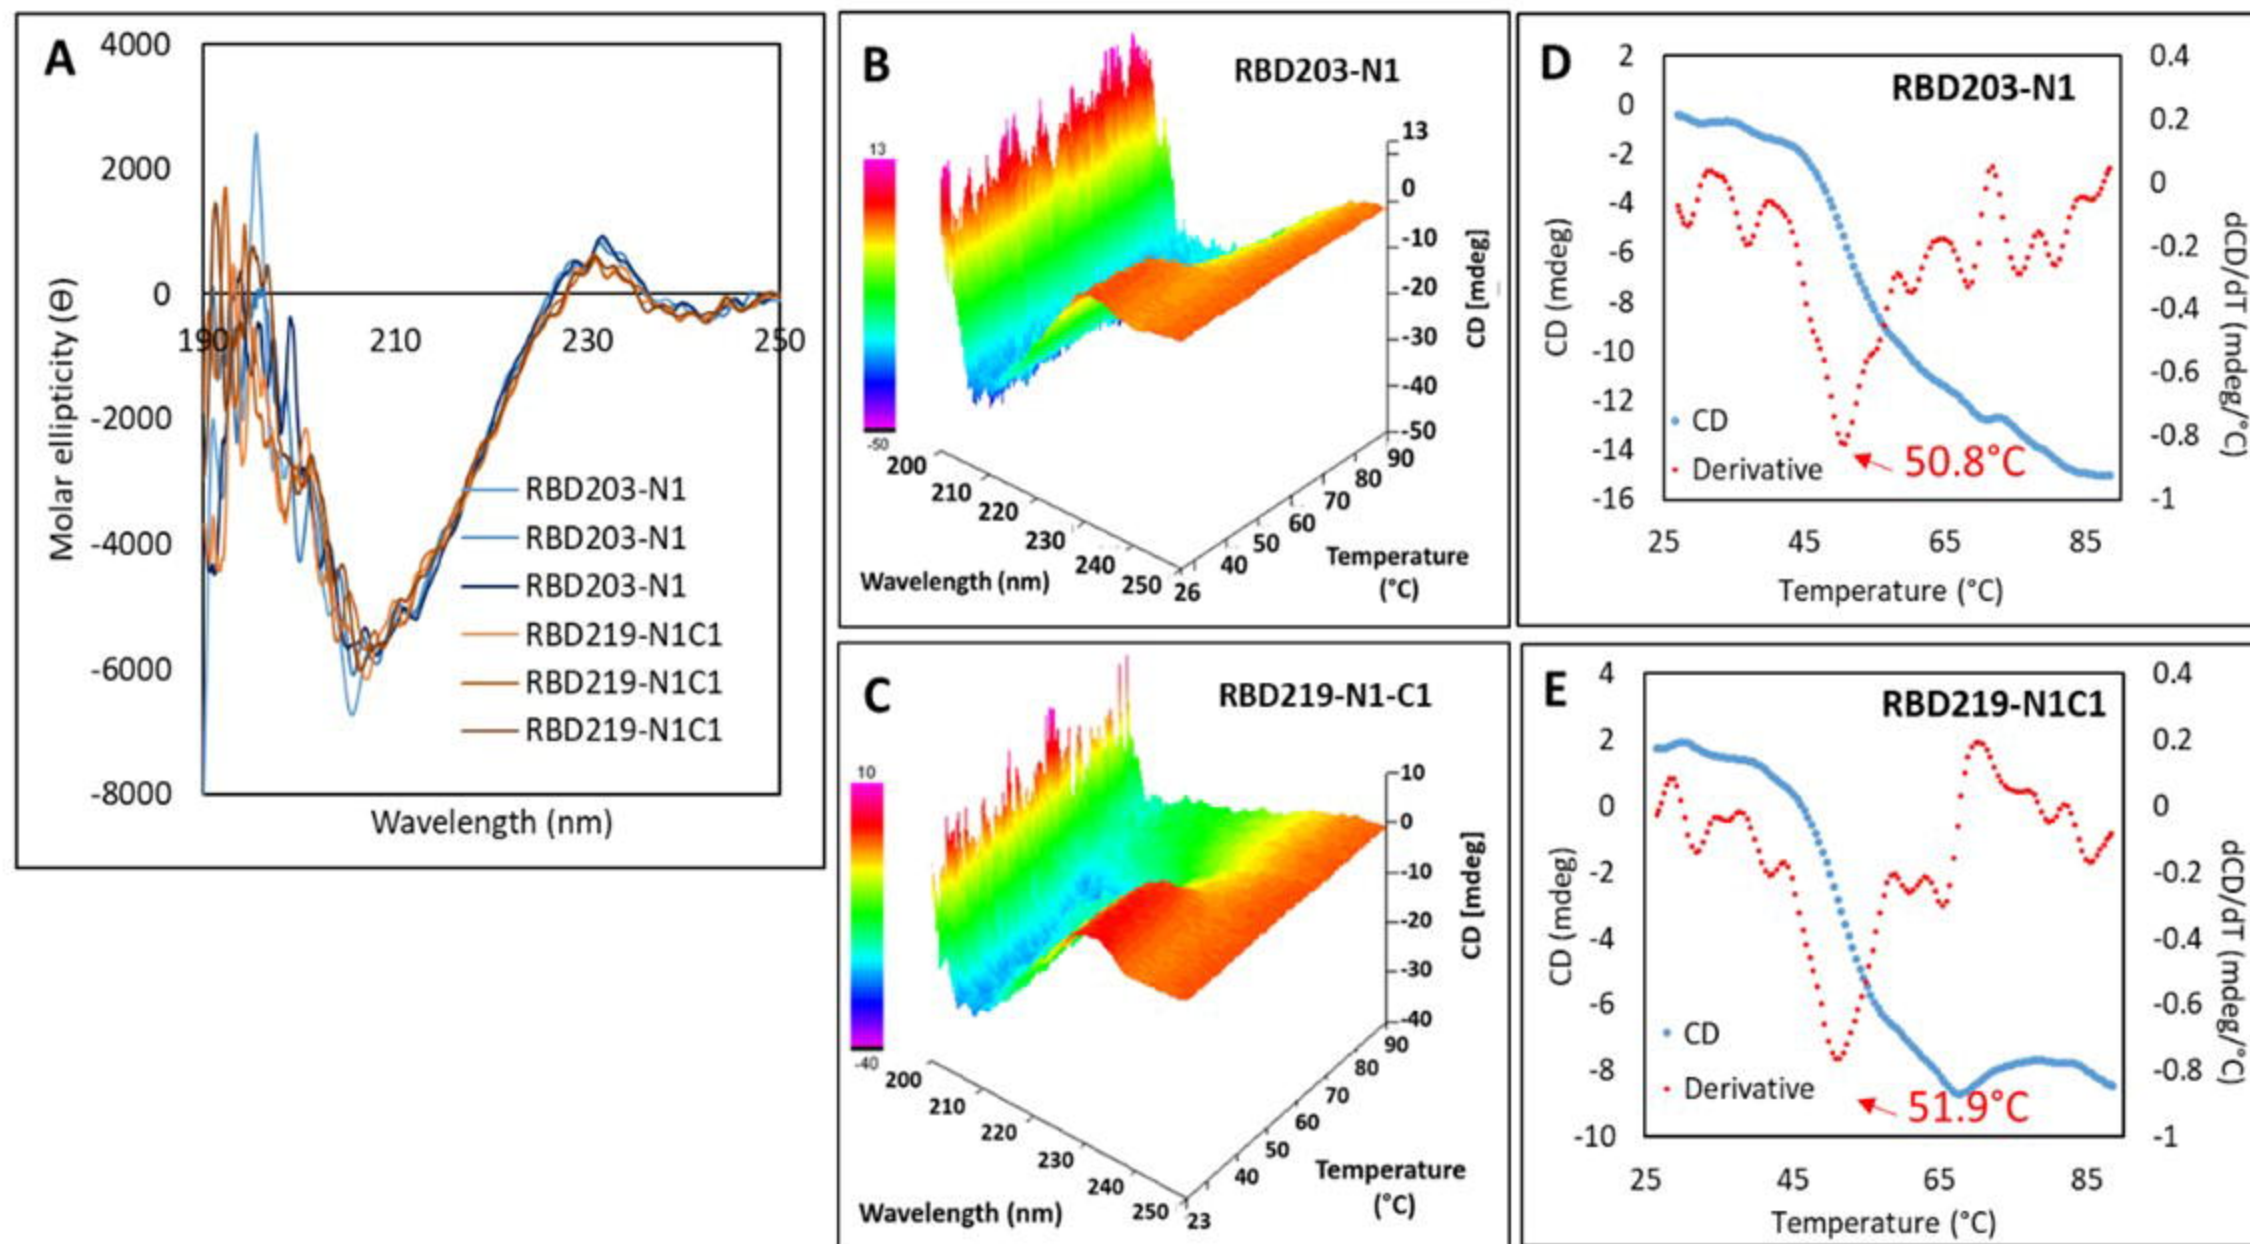

Figure 7

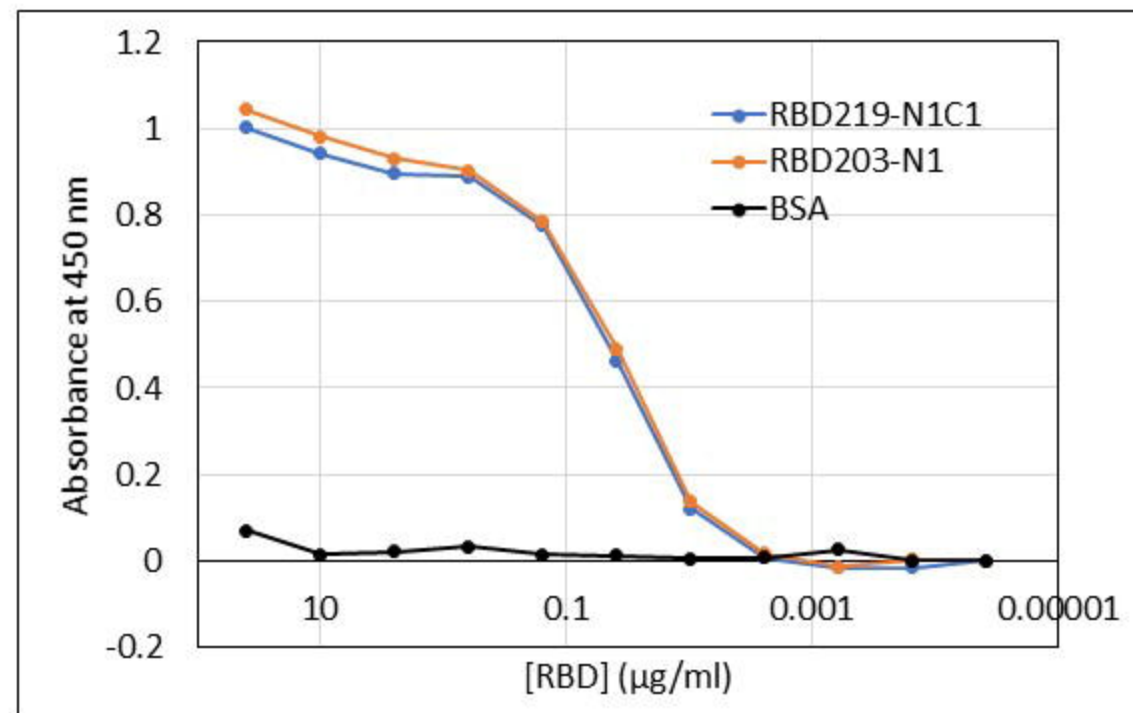



Figure 8

A

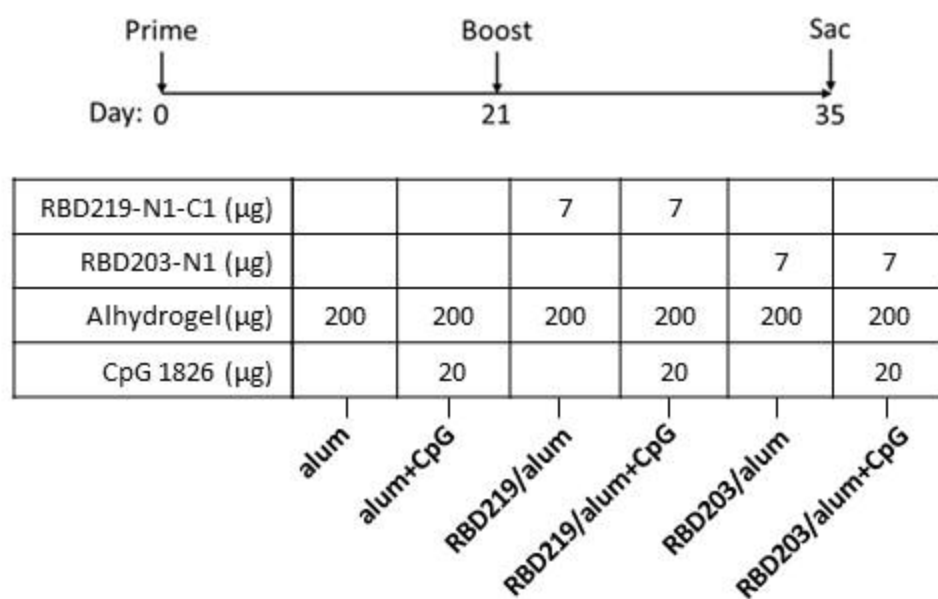

B

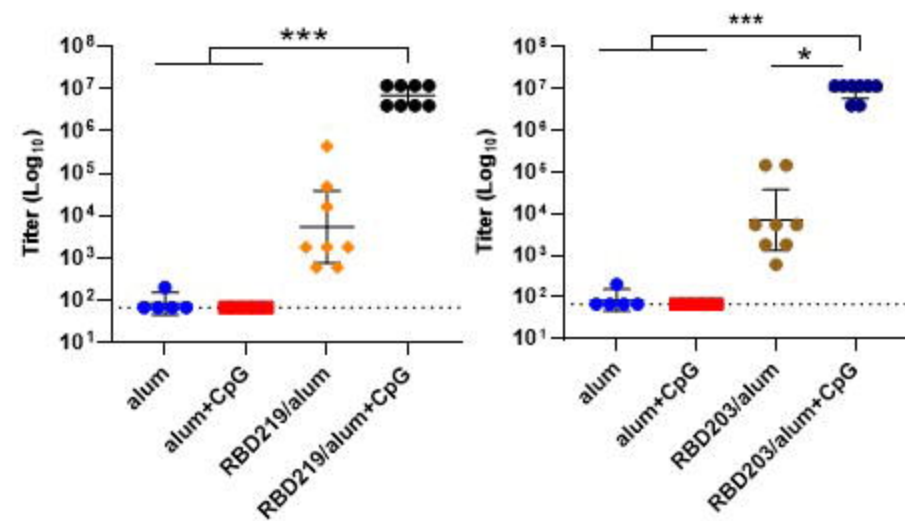

C

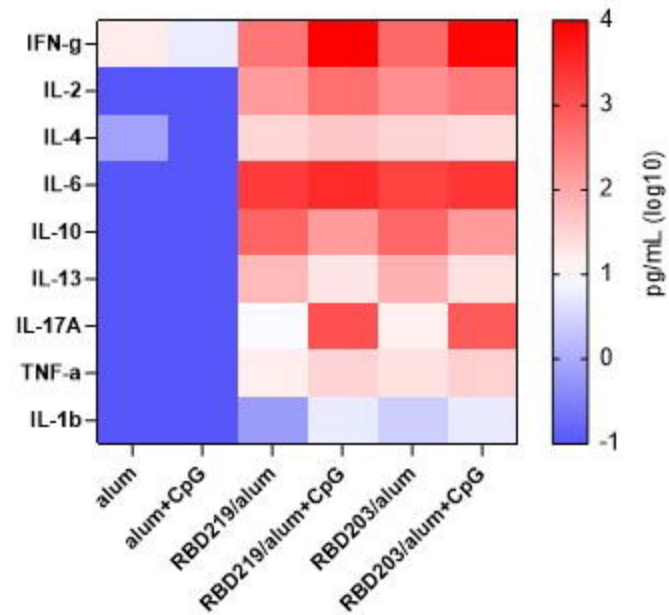

D

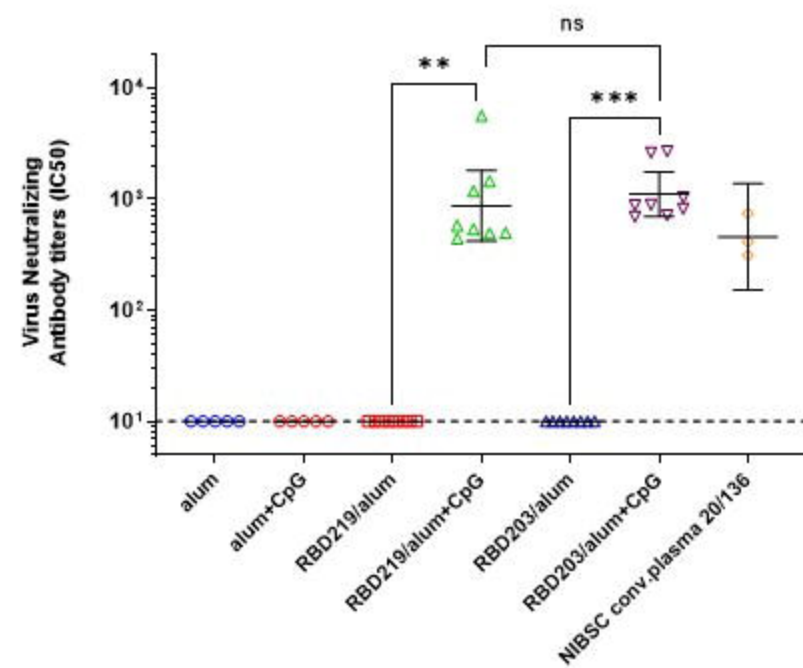

Source: https://www.biorxiv.org/content/10.1101/2021.08.24.457518v1.full.pdf
