# Supplementary material for: Yeast-expressed Recombinant SARS-CoV-2 Receptor Binding Domain, RBD203-N1 as a COVID-19 Protein Vaccine Candidate
Source: bioRxiv or medRxiv preprint supplement (doi:10.1101/2021.08.24.457518), 2021-08-25
Supplement: Supplementary file [file media-1.pdf]

## **Yeast-expressed Recombinant SARS-CoV-2 Receptor Binding Domain, RBD203-N1 as a COVID-19 Protein Vaccine Candidate**

Wen-Hsiang Chen<sup>a</sup>, Jeroen Pollet<sup>a</sup>, Ulrich Strych<sup>a</sup>, Jungsoon Lee<sup>a</sup>, Zhuyun Liu<sup>a</sup>, Rakhi Tyagi Kundu<sup>a</sup>, Leroy Versteeg<sup>a</sup>, Maria Jose Villar<sup>a</sup>, Rakesh Adhikari<sup>a</sup>, Junfei Wei<sup>a</sup>, Cristina Poveda<sup>a</sup>, Brian Keegan<sup>a</sup>, Aaron Oakley Bailey<sup>b</sup>, Yi-Lin Chen<sup>a</sup>, Portia M. Gillespie<sup>a</sup>, Jason T. Kimata<sup>c</sup>, Bin Zhan<sup>a</sup>, Peter J. Hotez<sup>acde</sup>, Maria Elena Bottazzi<sup>acdf\*</sup>

<sup>a</sup> Departments of Pediatrics; Texas Children's Hospital Center for Vaccine Development; National School of Tropical Medicine; Baylor College of Medicine, Houston, TX, USA

<sup>b</sup> Mass Spectrometry Facility, Department of Biochemistry and Molecular Biology, The University of Texas Medical Branch, Galveston, TX, USA

<sup>c</sup> Department of Molecular Virology and Microbiology, Baylor College of Medicine, Houston, TX, USA

<sup>d</sup> Department of Biology, Baylor University, Waco, TX, USA

<sup>e</sup> James A. Baker III Institute for Public Policy, Rice University, Houston, TX, USA

### **SUPPLEMENTARY DATA**

#### **Supplementary Method**

##### **Intact Mass Analysis of Deglycosylated Proteins**

RBD203-N1 or RBD219-N1C1 were treated with PNGase-F (NEB) following the vendor's manual to remove N-linked glycans. The deglycosylated proteins were then analyzed by micro-flow reversed-phase LC-MS using a 45-min gradient with an Ultimate 3000 UHPLC system coupled to Orbitrap Fusion mass spectrometer (ThermoFisher Scientific), operated at a resolution setting of 240,000 (at m/z 200). The data were analyzed using the Xtract deconvolution algorithm in Biopharma Finder v4.0 (ThermoFisher Scientific).

**Supplementary Table 1.** Study group and formulation information. N1C1: RBD219-N1C1; 203-N1: RBD203-N1.

| Group Label | Group Size | Mouse # | Antigen | Antigen Dose ( $\mu\text{g}$ ) | Adjuvant Molecule            | Adjuvant Dose ( $\mu\text{g}$ ) | Route | Volume (mL) |
|-------------|------------|---------|---------|--------------------------------|------------------------------|---------------------------------|-------|-------------|
| 1           | 5          | 1-5     | None    | -                              | Alhydrogel <sup>®</sup>      | 200                             | IM    | 0.05        |
| 2           | 5          | 6-10    | None    | -                              | Alhydrogel <sup>®</sup> +CpG | 200 + 20                        | IM    | 0.05        |
| 3           | 8          | 11-18   | N1C1    | 25                             | Alhydrogel <sup>®</sup>      | 200                             | IM    | 0.05        |
| 4           | 8          | 19-26   | 203-N1  | 25                             | Alhydrogel <sup>®</sup>      | 200                             | IM    | 0.05        |
| 5           | 8          | 27-34   | N1C1    | 7                              | Alhydrogel <sup>®</sup>      | 200                             | IM    | 0.05        |
| 6           | 8          | 35-42   | N1C1    | 7                              | Alhydrogel <sup>®</sup> +CpG | 200 + 20                        | IM    | 0.05        |
| 7           | 8          | 43-50   | 203-N1  | 7                              | Alhydrogel <sup>®</sup>      | 200                             | IM    | 0.05        |

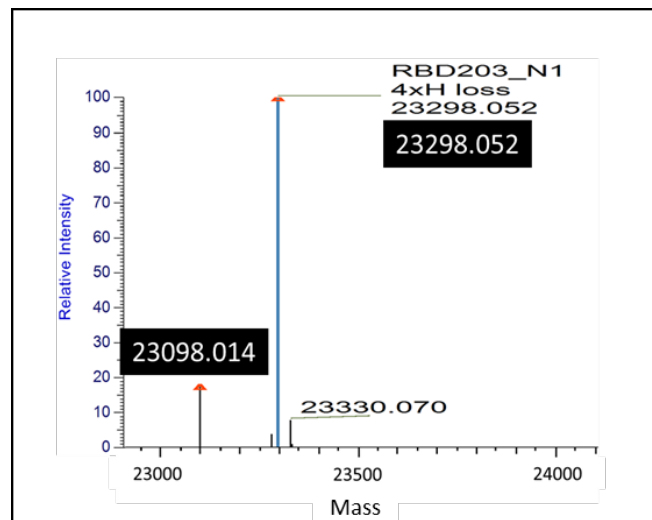

**Supplementary Figure 1.** Intact mass spectrometry for deglycosylated RBD203-N1. This result indicated two major species matching the sequences of (1) RBD203-N1<sup>a</sup> with additional EAEF amino acid residues at the N-terminus (23,098 Da), and (2) RBD203-N1<sup>b</sup> with additional EAEAEF amino acid residues at the N-terminus (23,298 Da). 82-85% of the RBD203-N1 is the EAEAEF variant while 15-18% is the EAEF variant.
